# Supplementary material for: The shape of watersheds
Source: PubMed Central journal article supplement (PMC6141598; doi:10.1038/s41467-018-06210-4), 2018-09-17
Supplement: 41467_2018_6210_MOESM1_ESM.pdf [file 41467_2018_6210_MOESM1_ESM.pdf]

# The shape of watersheds

Sassolas-Serrayet et al.

## List of authors:

Timothée Sassolas-Serrayet<sup>1\*</sup>, Rodolphe Cattin<sup>1</sup>, Matthieu Ferry<sup>1</sup>

<sup>1</sup> Géosciences Montpellier, Université de Montpellier and CNRS UMR 5243, 34090 Montpellier, France.\* e-mail: timothee.sassolas-serrayet@umontpellier.f

## Supplementary Information

### Contents

Supplementary Figure 1 to 7

### Introduction

This supporting information contains inversion results for  $n$  and  $c$  associated with basins in Bhutan, Southeast Africa, Iowa, Coastal Oregon and Pyrenees ; the location of elongated and compact basins in Bhutan Himalaya ; and the effect of DEM resolution.

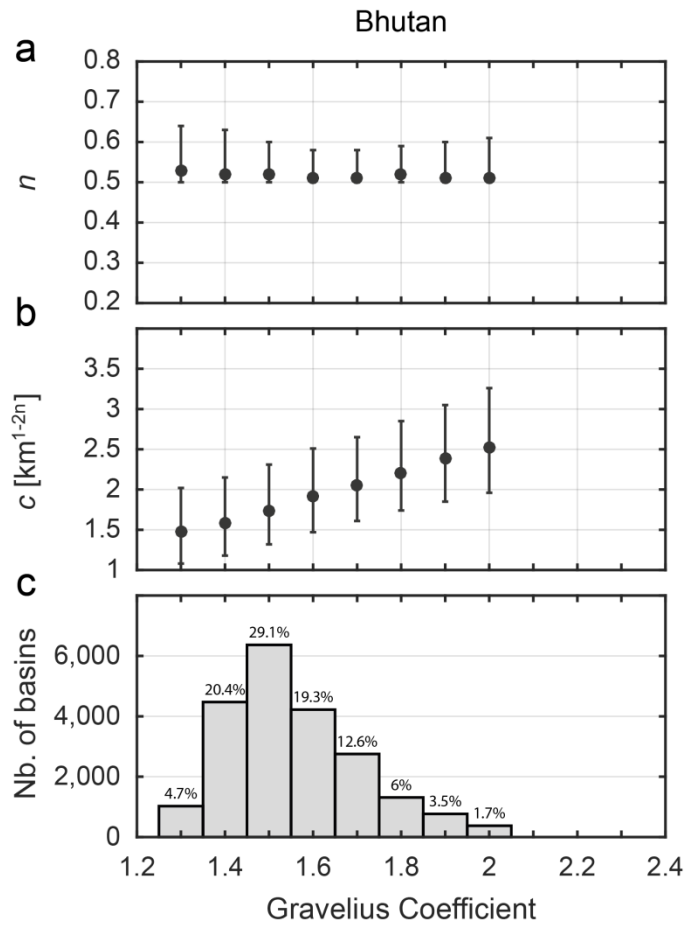

**Supplementary Figure 1 | Hack's Law parameters vs. Gravelius coefficient in Bhutan Himalaya.** Exponent and coefficient for each class of GC. Error bars are defined considering 95% of likelihood. **c**, Number of basins for each class of GC and its associated proportion.

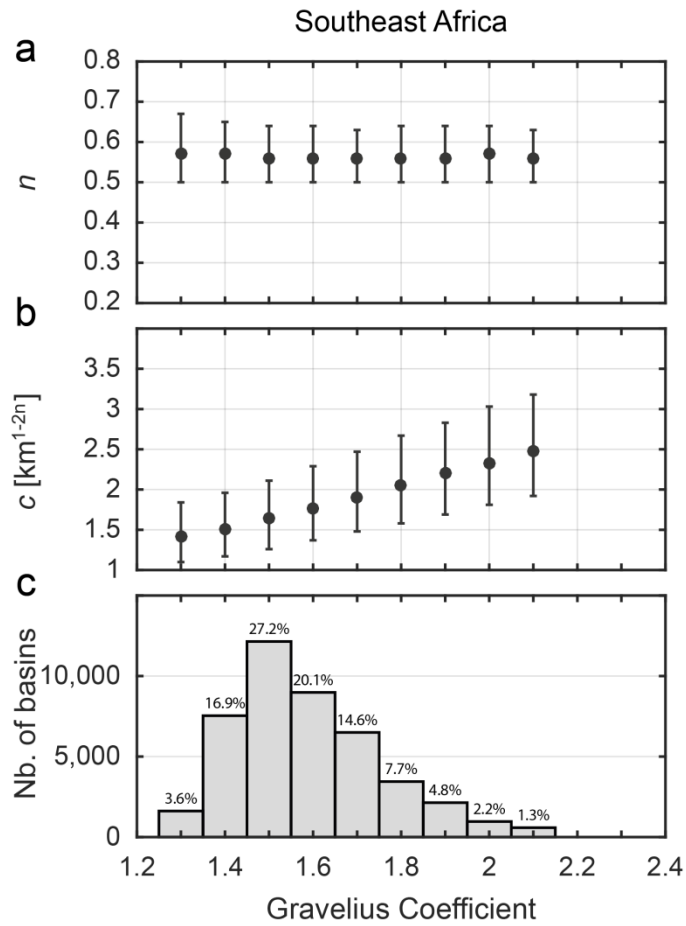

**Supplementary Figure 2 | Hack's Law parameters vs. Gravelius coefficient in south-east Africa.** Same as supplementary Figure 2, for south-east Africa.

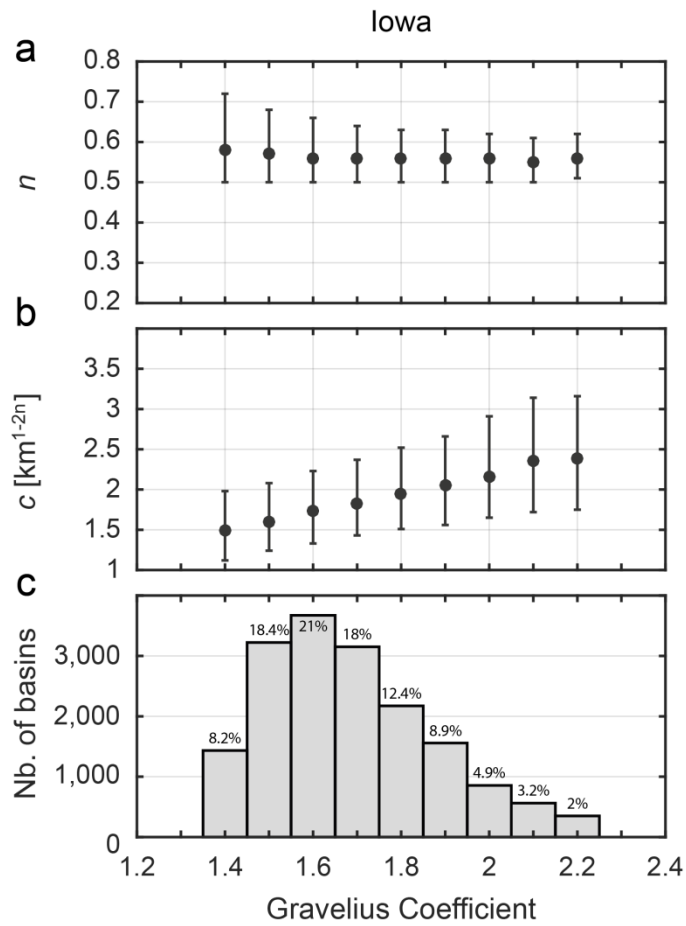

**Supplementary Figure 3 | Hack's Law parameters vs. Gravelius coefficient in Central Iowa.** Same as supplementary Figure 2, for Central Iowa.

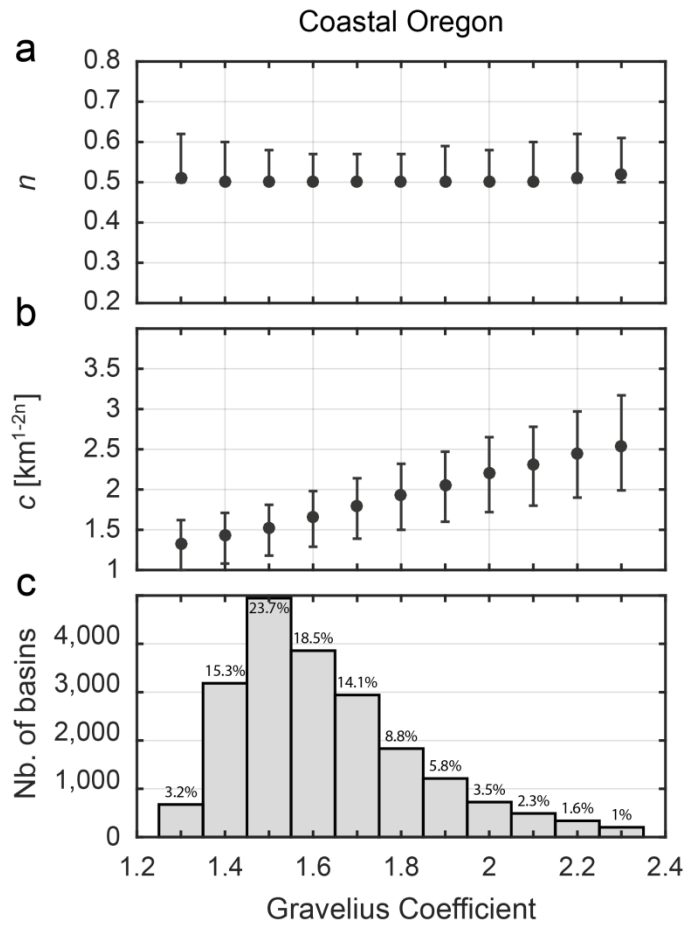

**Supplementary Figure 4 | Hack's Law parameters vs. Gravelius coefficient in Coastal Oregon.** Same as supplementary Figure 2, for Coastal Oregon.

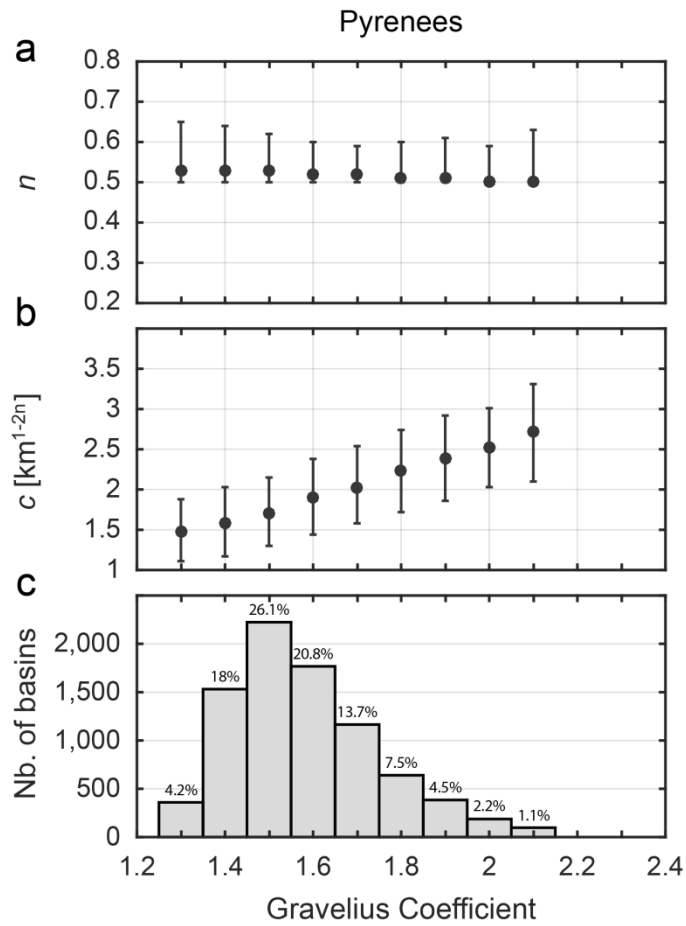

**Supplementary Figure 5 | Hack's Law parameters vs. Gravelius coefficient in Pyrenees.**  
 Same as supplementary Figure 2, for the Pyrenees.

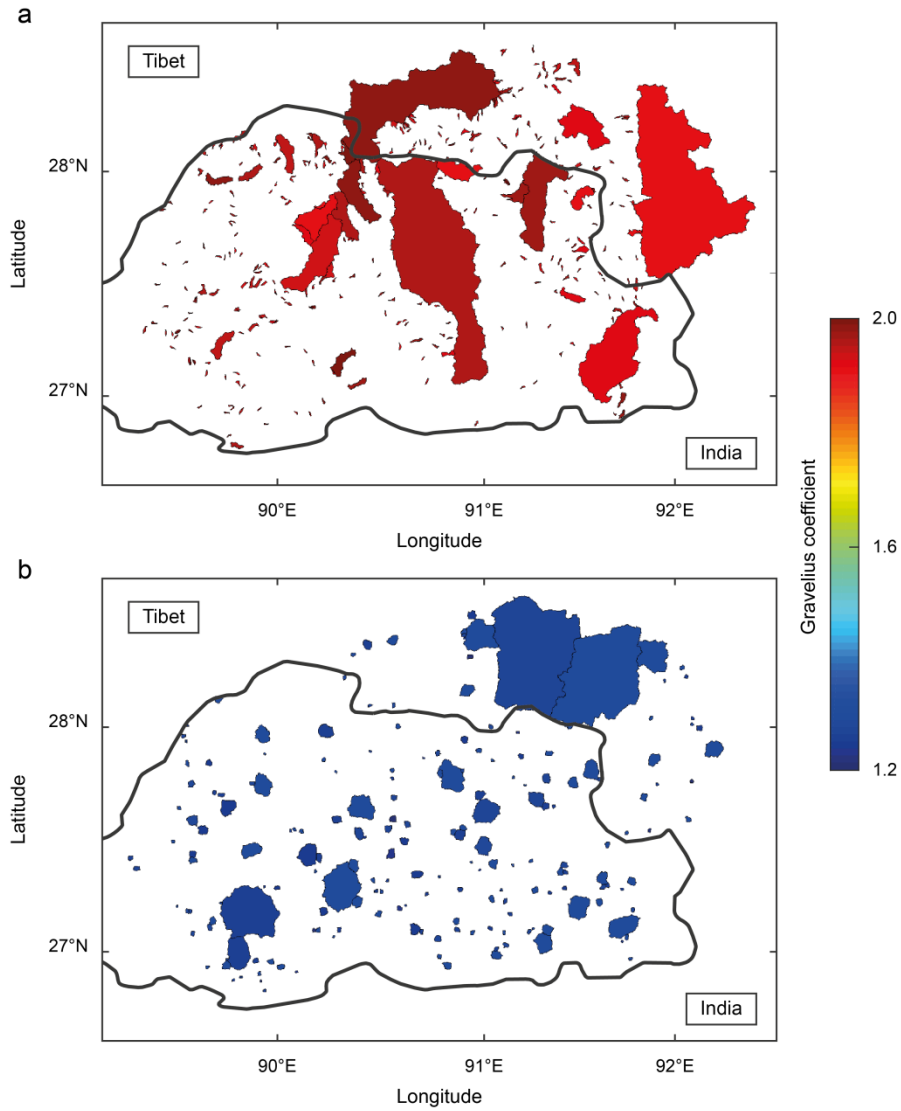

**Supplementary Figure 6 | Spatial distribution of drainage basins in Bhutan with respect to their shapes. a,** Location of elongated basins with GC ranging between 1.9 and 2.0. **b,** Location of compact basins with GC between 1.2 and 1.3.

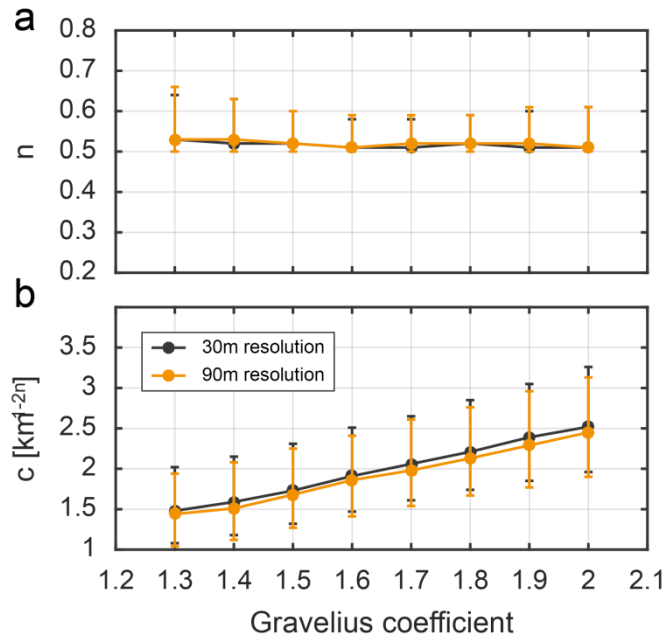

**Supplementary Figure 7 | Effect of DEM resolution on Hack's parameters. a and b**, Hack's exponent and coefficient obtained in Bhutan Himalaya for 30 m resolution DEM (grey) and 90 m resolution DEM (orange).
